# Supplementary material for: NiRu nanoparticles encapsulated in a nitrogen-doped carbon matrix as a highly efficient electrocatalyst for the hydrogen evolution reaction
Source: Royal Society of Chemistry journal article supplement (doi:10.1039/d0dt02961k), 2020-01-01
Supplement: d0dt02961k1.pdf [file d0dt02961k1.pdf]

# **NiRu nanoparticles encapsulated in nitrogen-doped carbon matrix as a highly efficient electrocatalyst for hydrogen evolution reaction**

Shikai Xu,<sup>a,b</sup> Zhiqiang Li,<sup>a,b</sup> Kainian Chu,<sup>a,b</sup> Ge Yao,<sup>a,b</sup> Yang Xu,<sup>a,b</sup> Ping Niu<sup>a,b</sup> and Fangcai Zheng<sup>\*a,b</sup>

<sup>a</sup> Key Laboratory of Structure and Functional Regulation of Hybrid Materials, Anhui University, Ministry of Education, Hefei, Anhui 230601, People's Republic of China

<sup>b</sup> Institutes of Physical Science and Information Technology, Anhui University, Hefei, Anhui 230601, People's Republic of China

---

\* zfcgai@mail.ustc.edu.cn

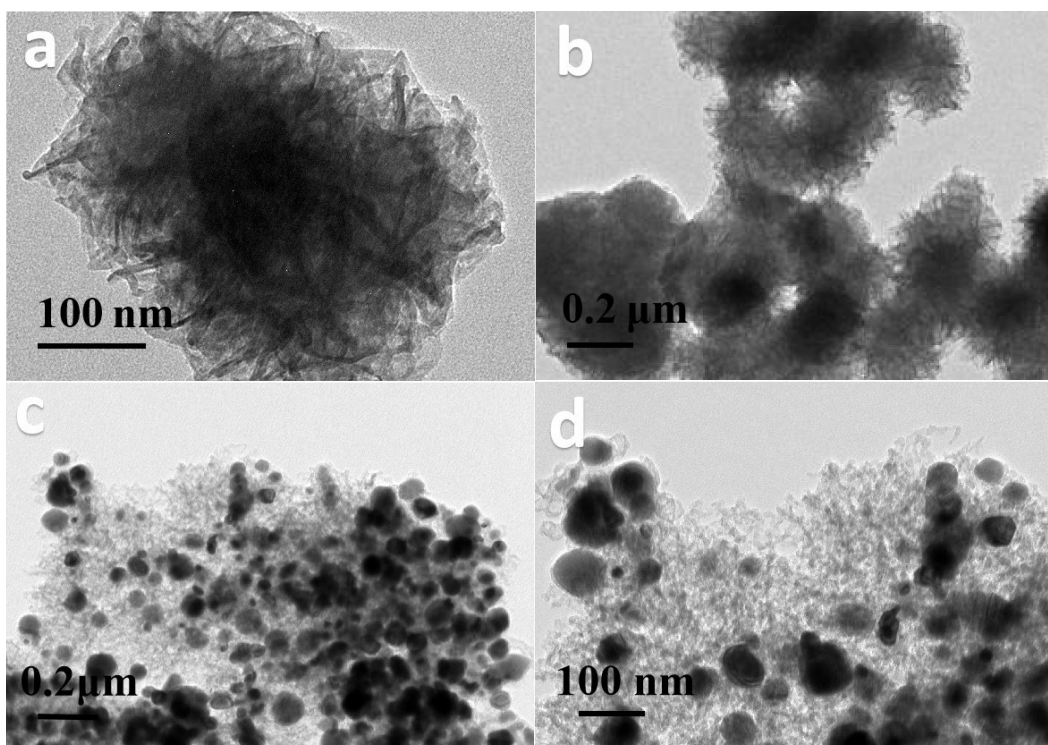

**Figure S1.** (a and b) TEM images of Ni-based MOFs and (c and d) Ni@NC.

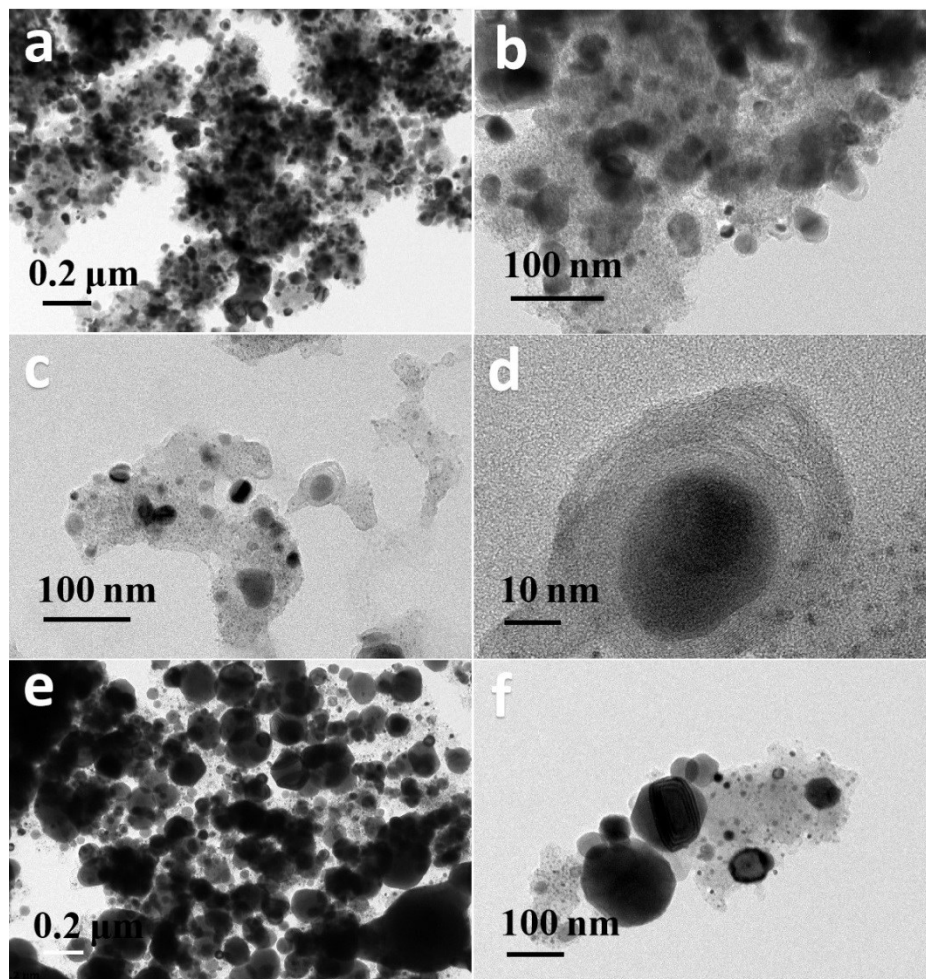

**Figure S2.** TEM images of (a and b) NiRu<sub>2</sub>@NC-600, (c and d) NiRu<sub>1</sub>@NC-600, and NiRu<sub>2</sub>@NC-800.

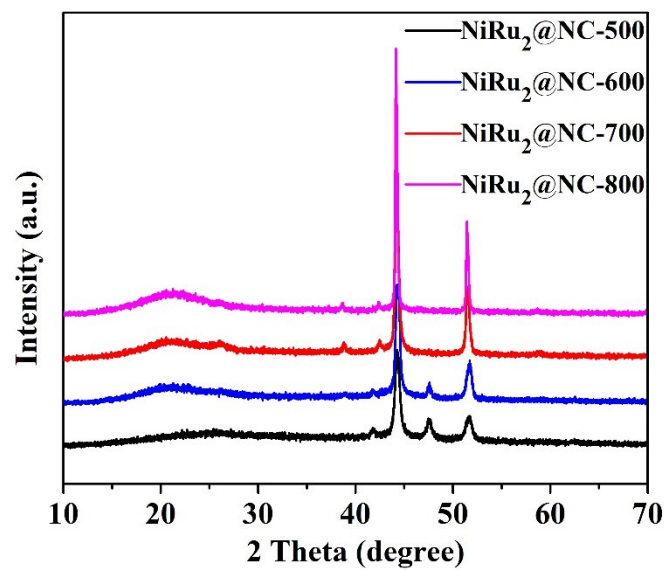

**Figure S3.** The XRD patterns of electrocatalysts obtained at different carbonization temperatures.

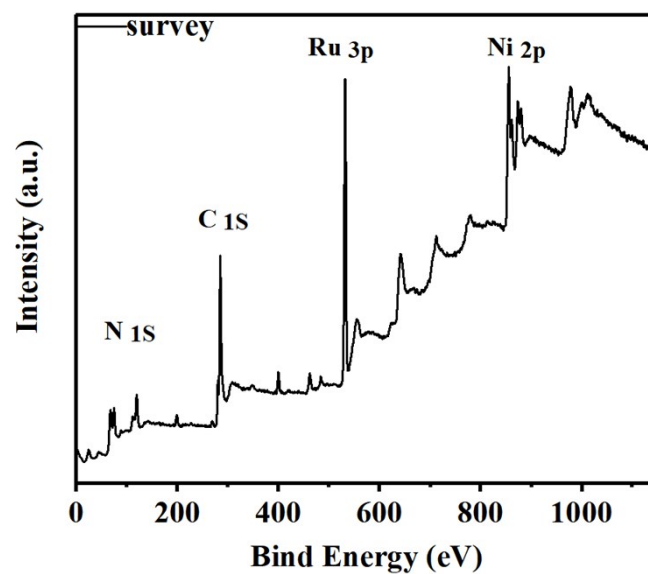

**Figure S4.** XPS spectrum of NiRu<sub>2</sub>@NC-600.

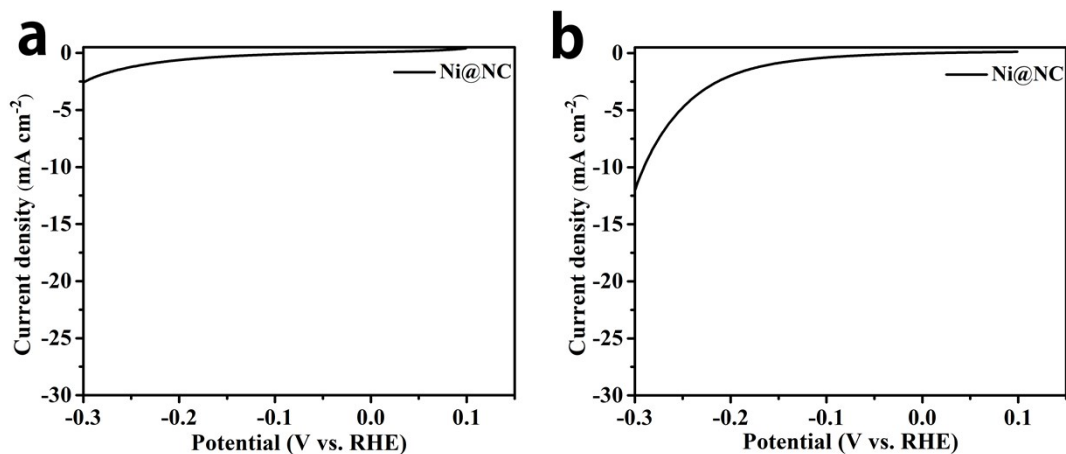

**Figure S5.** HER polarization curves of Ni@NC in (a) 0.5 M H<sub>2</sub>SO<sub>4</sub> and (b) 1.0 M KOH.

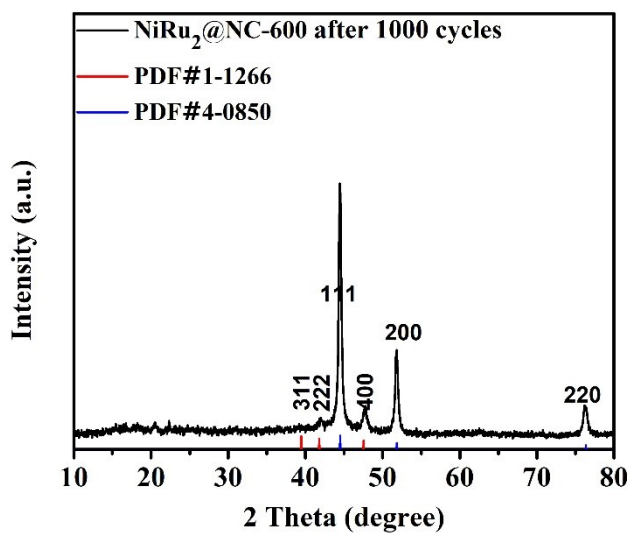

**Figure S6.** The XRD pattern of NiRu@NC-600 after 1000 cycles in 0.5 M H<sub>2</sub>SO<sub>4</sub>.

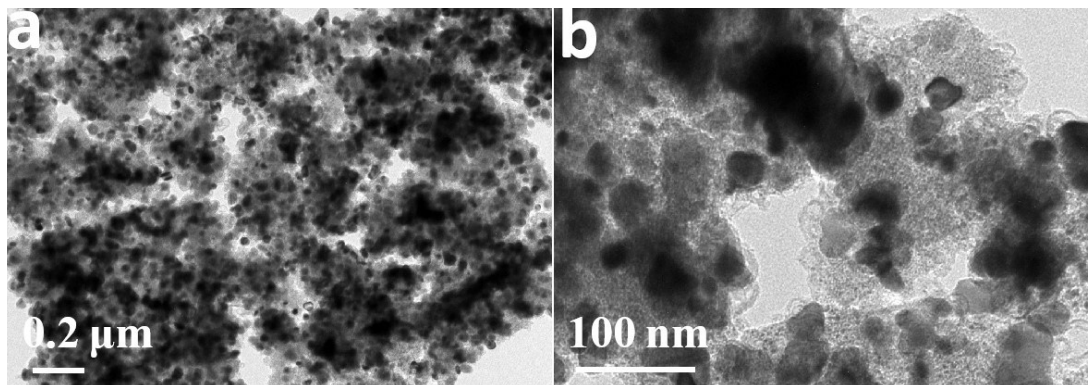

**Figure S7.** TEM images of NiRu@NC-600 after 1000 cycles in 0.5 M H<sub>2</sub>SO<sub>4</sub>.

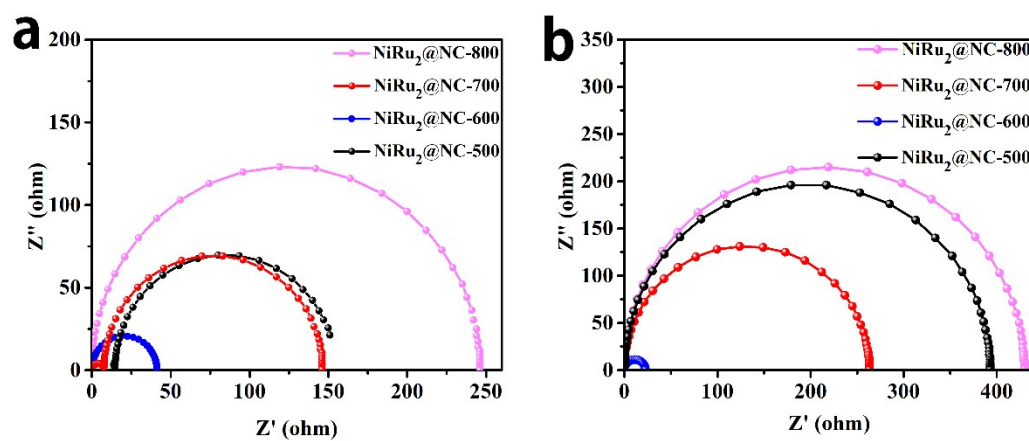

**Figure S8.** Nyquist curves for the catalysts in (a) 0.5 M H<sub>2</sub>SO<sub>4</sub> and (b) 1.0 M KOH.

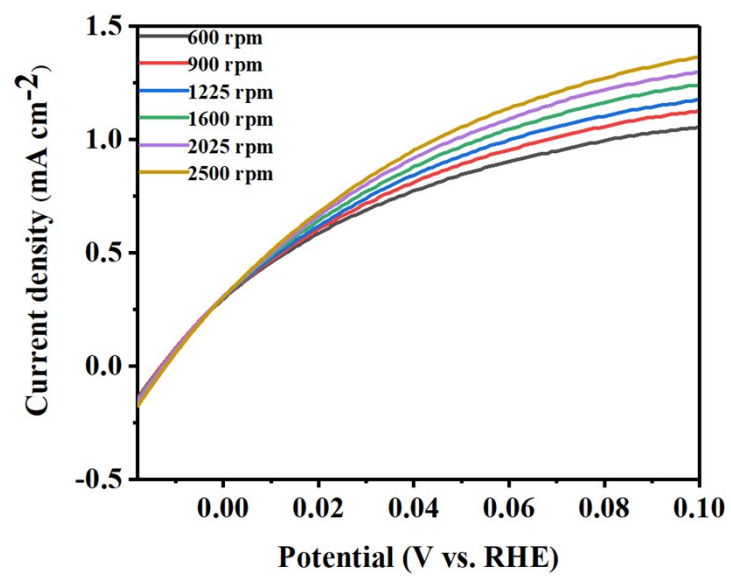

**Fig S9.** Polarization curves of NiRu<sub>2</sub>@NC-600 at different rotation rates.

**Table S1.** The relation of Ru in the NiRu<sub>x</sub>@NC-600 with initial addition content of RuCl<sub>3</sub> in the solution.

| <b>Samples</b>            | <b>The initial amount of RuCl<sub>3</sub> (mg)</b> | <b>Ru content (atom %)</b> |
|---------------------------|----------------------------------------------------|----------------------------|
| NiRu <sub>1</sub> @NC-600 | 10                                                 | 5.46 %                     |
| NiRu <sub>2</sub> @NC-600 | 15                                                 | 6.03 %                     |
| NiRu <sub>3</sub> @NC-600 | 20                                                 | 6.85 %                     |

**Table S2.** Summary electrochemical performance of NiRu@NC samples.

| <b>Sample</b>                  | <b>Overpotential</b>                          |                       | <b>Tafel slope</b>                                             |                                        |
|--------------------------------|-----------------------------------------------|-----------------------|----------------------------------------------------------------|----------------------------------------|
|                                | <b>0.5 M H<sub>2</sub>SO<sub>4</sub> (mV)</b> | <b>1.0 M KOH (mV)</b> | <b>0.5 M H<sub>2</sub>SO<sub>4</sub> (mV dec<sup>-1</sup>)</b> | <b>1.0 M KOH (mV dec<sup>-1</sup>)</b> |
| <b>NiRu<sub>2</sub>@NC-500</b> | 154                                           | 103                   | 90.1                                                           | 92.78                                  |
| <b>NiRu<sub>2</sub>@NC-600</b> | 87                                            | 53                    | 45.54                                                          | 37.95                                  |
| <b>NiRu<sub>2</sub>@NC-700</b> | 143                                           | 86                    | 73.66                                                          | 81.51                                  |
| <b>NiRu<sub>2</sub>@NC-800</b> | 240                                           | 287                   | 103.64                                                         | 132.79                                 |
| <b>NiRu<sub>1</sub>@NC-600</b> | 283                                           | 222                   | 144.64                                                         | 143.03                                 |
| <b>NiRu<sub>3</sub>@NC-600</b> | 253                                           | 96                    | 142.25                                                         | 81.59                                  |
